# Supplementary material for: Bacterial communities in a neotropical full-scale drinking water system including intermittent piped water supply, from sources to taps
Source: Royal Society of Chemistry journal article supplement (doi:10.1039/d3ew00224a), 2023-01-01
Supplement: d3ew00224a1.xlsx [file d3ew00224a1.xlsx]

## Sheet: Supp. Table 2
	Supplemental Table 2. Details for water samples collected for 16S rDNA metabarcoding
	Sample_Location	Location type	Sample No.	Sampling dates	Turbidity	pH	Conductivity	TDS	Temp	Total chlorine	Free chlorine	Pressure	Season	No. successful samples sequenced	Sequence count
	Region A
	Source 1. (pre-chlorinated)	Treatment Plant	1	2016-11-12	39.1	7.4	160	119	28.6	0.44	0.32	-	Dry	4	30129
			2	2017-03-04	51.82	7	300	225	29.6	0.67	0.55	-	Wet		32459
			3	07/13/2017	21.95	7.1	250	185	31.5	0.85	0.7	-	Wet		35651
			4	01/30/2018	22.08	6.8	240	188	30.9	0.07	0.07	-	Dry		35873
	Source 2	Treatment Plant	5	2016-11-12	33.74	7.8	530	387	30.1	0.09	0.08	-	Dry	4	30584
			6	2017-03-04	48.92	6.8	220	167	29	0.06	0.05	-	Wet		39981
			7	07/13/2017	54.51	7.4	480	351	30.8	0.06	0.05	-	Wet		32368
			8	01/30/2018	28.06	7.2	260	202	31.7	0.06	0.06	-	Dry		33796
	Filtration	Treatment Plant	9	2016-11-12	0.68	7.3	340	254	31.2	0.46	0.32	-	Dry	4	14312
			10	2017-03-04	0.31	7.1	170	131	29.3	1.26	1	-	Wet		20506
			11	07/13/2017	0.09	6.9	350	256	30.9	1.2	1.04	-	Wet		34487
			12	01/30/2018	0.52	6.8	220	169	29.7	1.18	0.94	-	Dry		32631
	Disinfection	Treatment Plant	13	2016-11-12	0.47	7.5	320	234	30.8	1	0.87	-	Dry	4	20665
			14	2017-03-04	0.03	7	170	131	30.1	1.24	1.16	-	Wet		6565
			15	07/13/2017	0.24	6.9	380	268	29.8	1.27	1.22	-	Wet		27022
			16	01/30/2018	0.3	6.5	220	168	28.7	1.37	1.19	-	Dry		26135
	1A	Distribution - Monitoring station	17	09/15/2016	0.48	7	340	245	29.6	1.08	0.9	25	Wet	5	19763
			18	03/21/2017	0.45	6.8	165	126.5	27.55	1.11	0.99	19	Wet		15435
			19	06/19/2017	0.23	7	390	279	28.8	1.35	1.18	20	Wet		14883
			20	2017-03-10	0.49	6.9	210	149	29.8	1.08	0.96	19	Wet		16053
			21	01/30/2018	0.39	6.5	360	277	28.9	1.1	1.04	23	Dry		39771
	2A	Distribution - Monitoring station	22	2016-12-10	0.49	6.8	440	317	29.6	1.09	1	23	Wet	7	42400
			23	2017-01-04	0.36	7.6	60	51	29.8	1.01	0.98	30	Dry		28113
			24	04/24/2017	0.61	6.5	460	330	28.9	1.07	0.93	17	Wet		5246
			25	06/26/2017	0.54	7.1	160	121	29.6	0.91	0.86	26	Wet		25953
			26	09/14/2016	0.35	7.2	280	206	28.7	1.04	0.89	21	Wet		23507
			27	2017-04-10	0.07	6.5	360	271	28	1.08	0.95	28	Wet		24886
			28	2017-10-10	0.37	6.6	470	272	29.7	1.04	0.87	32	Wet		10775
	3A	Distribution - Household	29	12/20/2016	0.26	6.7	170	129	27.6	1.17	1.07	35	Dry	4	44466
			30	03/17/2017	0.23	6.7	400	287	29.2	0.92	0.78	35	Dry		24746
			31	06/23/2017	0.47	7.1	290	211	27.8	1.05	1.01	34	Wet		24327
			32	2017-05-10	0.11	6.5	380	289	28.9	1.06	0.94	36	Wet		23097
	4A	Distribution - Monitoring station	33	2016-05-12	0.2	7	160	121	28	1.01	0.86	43	Dry	4	23769
			34	2017-03-02	0.58	7	470	340	28.9	1	0.91	56	Dry		14972
			35	2017-03-07	0.42	6.6	360	266	27	1.19	0.98	66	Wet		17961
			36	11/14/2017	0.45	6.6	330	252	30.1	1	0.8	40	Wet		22376
	5A	Distribution - Public location	37	01/29/2017	0.35	7.15	155	118	27.15	1.025	0.92	12	Dry	3	44128
			38	03/24/2017	0.28	6.8	350	254	29.8	1.09	1.01	9	Dry		6770
			39	08/22/2017	0.41	6.6	170	140	28.1	1.07	0.89	8	Wet		11927
	6A	Distribution - Monitoring station	40	10/15/2016	-	6.6	240	173	29.4	0.92	0.82	40	Wet	2	36508
			41	03/18/2017	0.28	6.8	400	285	28.7	1.03	0.68	41	Dry		15804
			42	2017-08-06	0.26	6.8	389	280	29	1.01	0.72	40	Wet		Failed
	Region B
	Source	Treatment Plant	43	03/13/2017	5.3	6.5	60	50	29.3	0.05	0	-	Dry	3	3842
			44	07/16/2017	2.1	6.7	60	49	28.9	0.05	0.05	-	Wet		37315
			45	10/18/2017	4.6	6.5	60	48	28.7	0	0	-	Wet		31263
	Filtration	Treatment Plant	46	03/13/2017	0.4	6.5	50	50	29	0.93	0.89	-	Dry	2	Failed
			47	07/16/2017	0.33	6.8	60	49	28.7	0.78	0.75	-	Wet		44734
			48	10/18/2017	0.25	6.6	60	48	28.5	1.12	1	-	Wet		53117
	Disinfection	Treatment Plant	49	03/13/2017	0.21	6.7	60	49	30	1.28	1.22	-	Dry	1	Failed
			50	07/16/2017	0.2	6.9	62	49	29	1.77	1.68	-	Wet		Failed
			51	10/18/2017	0.3	6.9	60	49	28.7	1.79	1.5	-	Wet		7132
	1B	Distribution -	52	2017-10-03	0.47	8.1	80	63	28.8	1.33	1.21	4	Dry	2	33891
			53	06/21/2017	0.12	7.7	80	63	27.9	1.29	1.18	5	Wet		Failed
			54	11/15/2017	0.14	7.4	80	64	27.8	1.39	1.25	9	Wet		29378
	2B	Distribution - Household	55	02/28/2017	0.42	7.4	70	60	29	1.4	1.22	50	Dry	4	2235
			56	2017-10-04	0.53	7.2	70	57	29.1	1.22	1.08	80	Dry		9137
			57	07/17/2017	0.52	7.2	70	63	28.2	1.31	1.16	67	Wet		9139
			58	2017-06-10	0.43	7.1	100	89	29.2	1.2	1.08	57	Wet		12615
	3B	Distribution - Monitoring station	59	04/24/2017	1.4	6.8	0.05	53	28.5	1.23	1.04	36	Dry	7	4057
			60	2017-07-07	0.16	6.9	0.06	63	30.5	1.11	0.96	21	Wet		5144
			61	07/26/2017	0.12	6.8	0.14	122	30.2	1.19	0.9	19	Wet		30894
			62	2017-02-08	0.35	7.2	0.05	53	29.8	1	0.8	24	Wet		21282
			63	2017-08-08	0.46	7.2	0.05	56	30.7	1.07	0.84	17	Wet		28235
			64	2017-06-09	0.12	7	0.06	77	28.3	1.2	1.14	12	Wet		17044
			65	09/27/2017	0.36	6.7	0.12	112	29.8	1.14	0.99	26	Wet		6724
	4B	Distribution - Monitoring station	66	2016-11-10	-	8.1	80	66	30.1	1.08	0.99	52	Wet	4	17700
			67	2017-11-03	0.47	7.4	70	62	28.7	1.1	1.05	65	Dry		24773
			68	08/18/2017	0.68	7.2	80	70	29.3	1.08	0.88	65	Wet		19346
			69	2017-08-11	0.47	6.8	120	108	29.8	1.06	0.93	47	Wet		7406
	5B	Distribution - Household	70	2016-09-12	1.24	6.7	70	58	28.1	0.99	0.88	56	Dry	3	12844
			71	03/29/2017	0.21	6.1	70	56	29.5	0.4	0.35	87	Dry		7668
			72	07/24/2017	0.36	6.7	60	57	29.4	0.46	0.3	46	Wet		12623
	6B	Distribution - Household	73	03/28/2017	0.2	6.5	60	51	29.3	0.54	0.44	31	Dry	3	13664
			74	05/20/2017	0.75	6.5	60	49	30.6	0.26	0.21	29	Wet		11386
			75	09/30/2017	0.67	6.8	20	45	30.4	0.74	0.63	26	Wet		16549
	7B	Distribution - Household	76	03/31/2017	0.32	6.4	60	54	29.8	0.16	0.05	50	Dry	3	19714
			77	05/15/2017	0.13	6.9	60	61	29.5	0.18	0.07	47	Wet		29366
			78	09/28/2017	0.08	6.8	50	48	29.5	0.21	0.19	48	Wet		25919
	Region C
	Source	Treatment Plant	79	03/15/2017	2.33	6.5	50	42	29	0	0	-	Dry	3	34649
			80	2017-12-07	2.14	6.9	50	44	30	0	0	-	Wet		30472
			81	2017-12-11	6.3	6.8	30	35	29.1	0	0	-	Wet		30513
	Filtration	Treatment Plant	82	03/15/2017	0.2	6.9	50	43	30	0	0	-	Dry	3	40451
			83	2017-12-07	0.35	6.9	50	47	29	0	0	-	Wet		37200
			84	2017-12-11	0.25	6.7	30	38	29.2	0	0	-	Wet		39006
	Disinfection	Treatment Plant	85	03/15/2017	0.19	6.4	60	50	28.2	1.14	1.02	-	Dry	3	29469
			86	2017-12-07	0.25	6.9	60	49	28.8	1.05	0.96	-	Wet		11615
			87	2017-12-11	0.24	6.9	50	48	27.6	1.21	1.02	-	Wet		19869
	1C	Distribution - Public location	88	01/26/2017	1.25	7.1	70	61	27.8	0.89	0.72	27	Dry	3	28093
			89	05/25/2017	0.32	6.5	70	55	28.7	0.74	0.64	25	Wet		35143
			90	2017-11-10	0.13	6.6	40	48	29.7	0.75	0.59	28	Wet		22018
	2C	Distribution - Public location	91	11/17/2016	0.19	7	60	54	28	0.3	0.28	40	Wet	4	26105
			92	01/24/2017	0.4	6.5	70	61	29	0.76	0.63	31	Dry		32574
			93	2017-05-04	0.45	7.2	70	60	29.8	0.93	0.8	42	Dry		5315
			94	08/28/2017	0.15	6.7	70	98	27.8	0.73	0.42	60	Wet		6983
	3C	Distribution - Public location	95	12/17/2016	0.47	6.9	70	56	28.4	0.69	0.56	23	Dry	3	22145
			96	04/28/2017	0.16	7	70	58	29.1	0.6	0.4	20	Wet		30866
			97	09/20/2017	0.02	6.4	50	51	28.5	0.63	0.52	25	Wet		28643
	4C	Distribution - Household	98	2016-08-11	0.26	6.4	70	55	27.4	0.09	0.04	55	Wet	3	30588
			99	02/24/2017	0.11	7.3	60	54	28.5	0.19	0.11	60	Dry		35965
			100	2017-04-07	0.1	7	60	52	27.8	0.14	0.11	44	Wet		19869
	5C	Distribution - Household	101	11/28/2016	0.24	6.3	70	59	28.4	0.14	0.03	48	Wet	4	44051
			102	01/30/2017	0.18	6.2	70	57	29.6	0.05	0.03	72	Dry		52915
			103	2017-07-04	0.29	6.6	60	55	31.2	0.03	0.03	56	Dry		40262
			104	07/31/2017	0.69	6.7	70	57	29.3	0	0	77	Wet		37433
	First Flush at location 3B
	3B	Distribution - Monitoring station	105	2017-02-02	0.23	6.9	0.16	124	30.5	0.01	0.01	4	Dry	14	37420
			106	2017-07-02	1.4	6.9	0.14	116	32	0	0	8	Dry		2270
			107	04/22/2017	0.95	6.8	0.06	53	33.1	0.1	0.1	4	Wet		6284
			108	04/28/2017	0.58	7.5	0.12	93	30.9	0	0	10	Wet		10351
			109	2017-06-05	0.76	7.5	0.1	81	30.2	0.02	0.02	8	Wet		14053
			110	2017-12-05	0.78	6.7	0.06	74	31	0.02	0.02	8	Wet		27540
			111	07/20/2017	0.51	7.6	0.05	50	30	0.3	0.3	5	Wet		26256
			112	07/25/2017	0.26	7	0.06	66	31.2	0.04	0.04	6	Wet		2578
			113	2017-01-08	0.05	6.5	0.07	71	29.7	0	0	10	Wet		46104
			114	2017-07-08	0.14	7.4	0.07	77	31.8	0.03	0.03	8	Wet		39890
			115	08/15/2017	1.3	6.8	0.07	77	30.7	0.03	0.03	6	Wet		29836
			116	2017-05-09	0.36	7	0.01	58	33	0.03	0.03	8	Wet		20038
			117	09/20/2017	0.29	6.9	0.06	75	31.9	0	0	6	Wet		12643
			118	09/26/2017	0.45	6.7	0.05	82	33.3	0.04	0.03	6	Wet		12112

## Sheet: Supp. Table 5
	Supplemental table 5. Taxonomic classifcation and percent relative abundance of bacterial sequences found in samples from the IWS sector (Continuous supply at the entrace of the sector, Stable IWS and First Flush samples).
	Taxonomic Classification						Percent Relative Abundance (%)
	Kingdom	Phylum	Class	Order	Family	Genus	Continuous	Stable	First-Flush
	Shared by all sample types
	Bacteria	Proteobacteria	Alphaproteobacteria	Sphingomonadales	Sphingomonadaceae	Sphingomonas	0.424788	4.41529	22.0828
	Bacteria	Proteobacteria	Gammaproteobacteria	Pseudomonadales	Pseudomonadaceae	Pseudomonas	3.43578	19.1086	12.9086
	Bacteria	Proteobacteria	Gammaproteobacteria	Burkholderiales	Oxalobacteraceae	Undibacterium	18.5657	0.895553	7.02156
	Bacteria	Proteobacteria	Alphaproteobacteria	Rhizobiales	Rhizobiales_Incertae_Sedis	Phreatobacter	1.43678	6.93533	5.91705
	Bacteria	Proteobacteria	Alphaproteobacteria	Rickettsiales	Rickettsiaceae	Candidatus_Megaira	1.28686	9.44497	3.2309
	Bacteria	Proteobacteria	Gammaproteobacteria	Salinisphaerales	Solimonadaceae	Nevskia	0.0124938	0.541497	2.8214
	Bacteria	Proteobacteria	Alphaproteobacteria	Sphingomonadales	Sphingomonadaceae	Blastomonas	0.049975	0.0208268	2.77632
	Bacteria	Proteobacteria	Alphaproteobacteria	Sphingomonadales	Sphingomonadaceae	Porphyrobacter	0.049975	0.749766	2.055
	Bacteria	Proteobacteria	Alphaproteobacteria	Rickettsiales	Rickettsiaceae	Unclassified	0.89955	4.67562	1.92727
	Bacteria	Bdellovibrionota	Oligoflexia	Silvanigrellales	Silvanigrellaceae	Silvanigrella	40.8546	14.9641	1.87467
	Bacteria	Proteobacteria	Alphaproteobacteria	Sphingomonadales	Sphingomonadaceae	Unclassified	6.1969	3.69676	1.5591
	Bacteria	Cyanobacteria	Vampirivibrionia	Obscuribacterales	Obscuribacteraceae	Obscuribacter	12.019	5.75862	1.46142
	Bacteria	Proteobacteria	Alphaproteobacteria	Sphingomonadales	Sphingomonadaceae	Novosphingobium	0.0249875	0.0937207	1.32617
	Bacteria	Proteobacteria	Alphaproteobacteria	Caulobacterales	Hyphomonadaceae	Unclassified	1.36182	8.18494	1.23601
	Bacteria	Bdellovibrionota	Oligoflexia	Oligoflexales	uncultured	Unclassified	0.124938	0.510257	0.939214
	Bacteria	Proteobacteria	Alphaproteobacteria	Paracaedibacterales	Paracaedibacteraceae	Candidatus_Finniella	0.0124938	1.94731	0.807724
	Bacteria	Proteobacteria	Alphaproteobacteria	Rhizobiales	Beijerinckiaceae	Methylobacterium	0.0874563	0.281162	0.698775
	Bacteria	Bacteroidota	Bacteroidia	Sphingobacteriales	Sphingobacteriaceae	Pedobacter	1.42429	0.385296	0.533474
	Bacteria	Proteobacteria	Gammaproteobacteria	Burkholderiales	Alcaligenaceae	Candidimonas	0.112444	0.406123	0.338117
	Bacteria	Firmicutes	Bacilli	Bacillales	Bacillaceae	Bacillus	0.124938	0.208268	0.330603
	Bacteria	Proteobacteria	Gammaproteobacteria	Burkholderiales	Neisseriaceae	Unclassified	0.0374813	0.270749	0.319333
	Bacteria	Planctomycetota	Planctomycetes	Pirellulales	Pirellulaceae	Unclassified	0.0249875	0.156201	0.251709
	Bacteria	Cyanobacteria	Cyanobacteriia	Cyanobacteriales	Nostocaceae	Dolichospermum_NIES41	0.612194	1.58284	0.20287
	Bacteria	Bacteroidota	Bacteroidia	Cytophagales	Amoebophilaceae	Candidatus_Amoebophilus	0.049975	0.406123	0.199113
	Bacteria	Proteobacteria	Gammaproteobacteria	Aeromonadales	Aeromonadaceae	Aeromonas	0.0124938	0.406123	0.195357
	Bacteria	Proteobacteria	Gammaproteobacteria	Burkholderiales	Rhodocyclaceae	Dechloromonas	0.187406	0.114548	0.169059
	Bacteria	Proteobacteria	Alphaproteobacteria	Holosporales	Holosporaceae	Unclassified	0.149925	0.687285	0.169059
	Bacteria	Proteobacteria	Gammaproteobacteria	Burkholderiales	Chromobacteriaceae	Chromobacterium	0.537231	0.728939	0.142761
	Bacteria	Planctomycetota	Planctomycetes	Gemmatales	Gemmataceae	Unclassified	0.0374813	0.187441	0.112706
	Bacteria	Actinobacteriota	Actinobacteria	Corynebacteriales	Mycobacteriaceae	Mycobacterium	0.0249875	0.0624805	0.101435
	Bacteria	Proteobacteria	Alphaproteobacteria	Rickettsiales	Rickettsiales	Candidatus_Midichloria	0.149925	0.218682	0.101435
	Bacteria	Myxococcota	Polyangia	Polyangiales	Polyangiaceae	Pajaroellobacter	0.162419	0.114548	0.0976783
	Bacteria	Proteobacteria	Alphaproteobacteria	Rickettsiales	uncultured	Unclassified	0.187406	0.0104134	0.0864077
	Bacteria	Cyanobacteria	Cyanobacteriia	Cyanobacteriales	Nostocaceae	Cylindrospermopsis_CRJ1	0.324838	0.385296	0.052596
	Bacteria	Proteobacteria	Alphaproteobacteria	Paracaedibacterales	Paracaedibacteraceae	Unclassified	0.0124938	0.0624805	0.0450823
	Bacteria	Proteobacteria	Gammaproteobacteria	Francisellales	Francisellaceae	Unclassified	0.0874563	0.0104134	0.0338117
	Bacteria	Verrucomicrobiota	uncultured	uncultured	uncultured	Unclassified	0.0124938	0.135374	0.0187843
	Bacteria	Bacteroidota	Bacteroidia	Cytophagales	Amoebophilaceae	Candidatus_Paenicardinium	0.0624688	0.374883	0.0187843
	Bacteria	Proteobacteria	Gammaproteobacteria	Gammaproteobacteria_Incertae_Sedis	Unknown_Family	Candidatus_Ovatusbacter	0.237381	0.0520671	0.0150274
	Bacteria	Proteobacteria	Alphaproteobacteria	Rickettsiales	Candidatus_Hepatincola	Candidatus_Hepatincola	0.0249875	0.104134	0.0112706
	Bacteria	Firmicutes	Limnochordia	Limnochordia	Limnochordia	Hydrogenispora	0.0249875	0.281162	0.00751371
	Bacteria	Fusobacteriota	Fusobacteriia	Fusobacteriales	Leptotrichiaceae	Unclassified	0.049975	0.468604	0.00751371
	Bacteria	Proteobacteria	Gammaproteobacteria	Pseudomonadales	Moraxellaceae	Acinetobacter	0.049975	0.0312402	0.00375686
	Percentage of relative abundance						91.5667	90.076	74.2092
	Kingdom	Phylum	Class	Order	Family	Genus	Continuous	Stable	First-Flush
	Shared only by Continuous supply
	Bacteria	Actinobacteriota	Actinobacteria	Micrococcales	Microbacteriaceae	Curtobacterium	0.112444	-	-
	Bacteria	Proteobacteria	Gammaproteobacteria	Enterobacterales	Yersiniaceae	Serratia	0.049975	-	-
	Bacteria	Proteobacteria	Gammaproteobacteria	Oceanospirillales	Saccharospirillaceae	Oceanobacter	0.0374813	-	-
	Bacteria	Firmicutes	Clostridia	Clostridiales	Clostridiaceae	Clostridium_sensu_stricto_10	0.0374813	-	-
	Bacteria	Proteobacteria	Alphaproteobacteria	Holosporales	Holosporaceae	Candidatus_Bealeia	0.0249875	-	-
	Bacteria	Firmicutes	Desulfitobacteriia	Desulfitobacteriales	Desulfitobacteriaceae	Desulfitobacterium	0.0249875	-	-
	Bacteria	Proteobacteria	Gammaproteobacteria	uncultured	uncultured	Unclassified	0.0124938	-	-
	Bacteria	Bacteroidota	Kryptonia	Kryptoniales	uncultured	Unclassified	0.0124938	-	-
	Percentage of relative abundance						0.312344	-	-
	Kingdom	Phylum	Class	Order	Family	Genus	Continuous	Stable	First-Flush
	Shared only by Continuous and stable IWS
	Bacteria	Proteobacteria	Gammaproteobacteria	Gammaproteobacteria_Incertae_Sedis	uncultured	Unclassified	0.0124938	0.0208268	-
	Bacteria	Proteobacteria	Gammaproteobacteria	Burkholderiales	Burkholderiaceae	Burkholderia	4.54773	2.52005	-
	Bacteria	Proteobacteria	Gammaproteobacteria	Burkholderiales	Burkholderiaceae	Polynucleobacter	0.874563	0.926794	-
	Bacteria	Firmicutes	Clostridia	Clostridiales	Clostridiaceae	Clostridium_sensu_stricto_1	0.0124938	0.0104134	-
	Percentage of relative abundance						5.44728	3.47808	-
	Kingdom	Phylum	Class	Order	Family	Genus	Continuous	Stable	First-Flush
	Shared only by IWS supply (Stable and first flush)
	Bacteria	Proteobacteria	Gammaproteobacteria	Burkholderiales	Chitinimonadaceae	Chitinimonas	-	0.499844	2.54715
	Bacteria	Proteobacteria	Gammaproteobacteria	Burkholderiales	Alcaligenaceae	Achromobacter	-	2.00979	0.522203
	Bacteria	Myxococcota	Polyangia	Haliangiales	Haliangiaceae	Haliangium	-	0.0937207	0.488391
	Bacteria	Cyanobacteria	Vampirivibrionia	Obscuribacterales	Obscuribacteraceae	Candidatus_Obscuribacter	-	0.447777	0.447066
	Bacteria	Proteobacteria	Alphaproteobacteria	Rickettsiales	Fokiniaceae	Unclassified	-	0.88514	0.428282
	Bacteria	Verrucomicrobiota	Chlamydiae	Chlamydiales	Simkaniaceae	Unclassified	-	0.0624805	0.383199
	Bacteria	Firmicutes	Bacilli	Paenibacillales	Paenibacillaceae	Paenibacillus	-	0.229095	0.236682
	Bacteria	Proteobacteria	Gammaproteobacteria	Enterobacterales	Morganellaceae	Unclassified	-	0.0208268	0.206627
	Bacteria	Dependentiae	Babeliae	Babeliales	Vermiphilaceae	Unclassified	-	0.0624805	0.187843
	Bacteria	Myxococcota	Polyangia	uncultured	uncultured	Unclassified	-	0.0208268	0.184086
	Bacteria	Proteobacteria	Alphaproteobacteria	Rhizobiales	Hyphomicrobiaceae	Hyphomicrobium	-	0.187441	0.142761
	Bacteria	Firmicutes	Bacilli	Alicyclobacillales	Alicyclobacillaceae	Tumebacillus	-	0.0208268	0.123976
	Bacteria	Proteobacteria	Gammaproteobacteria	Legionellales	Legionellaceae	Legionella	-	0.0104134	0.112706
	Bacteria	Proteobacteria	Alphaproteobacteria	Caulobacterales	Hyphomonadaceae	SWB02	-	0.0937207	0.101435
	Bacteria	Bacteroidota	Bacteroidia	Flavobacteriales	Weeksellaceae	Chryseobacterium	-	0.843486	0.078894
	Bacteria	Myxococcota	Myxococcia	Myxococcales	Myxococcaceae	P3OB-42	-	0.0104134	0.0488391
	Bacteria	Proteobacteria	Gammaproteobacteria	Methylococcales	Methylomonadaceae	Methylomonas	-	0.145788	0.0488391
	Bacteria	Dependentiae	Babeliae	Babeliales	uncultured	Unclassified	-	0.0208268	0.0413254
	Bacteria	Proteobacteria	Alphaproteobacteria	uncultured	uncultured	Unclassified	-	0.114548	0.0338117
	Bacteria	Actinobacteriota	Thermoleophilia	Solirubrobacterales	uncultured	Unclassified	-	0.0104134	0.0338117
	Bacteria	Verrucomicrobiota	Verrucomicrobiae	Methylacidiphilales	Methylacidiphilaceae	Unclassified	-	0.0312402	0.0300549
	Bacteria	Proteobacteria	Gammaproteobacteria	Burkholderiales	Nitrosomonadaceae	Nitrosomonas	-	0.0104134	0.026298
	Bacteria	Cyanobacteria	Cyanobacteriia	Synechococcales	Cyanobiaceae	Cyanobium_PCC-6307	-	0.0208268	0.0225411
	Bacteria	Chloroflexi	Anaerolineae	SBR1031	A4b	A4b	-	0.0208268	0.0187843
	Bacteria	Proteobacteria	Alphaproteobacteria	Rickettsiales	Fokiniaceae	MD3-55	-	0.0728939	0.0150274
	Bacteria	Planctomycetota	Planctomycetes	Isosphaerales	Isosphaeraceae	Unclassified	-	0.0208268	0.00751371
	Bacteria	Dependentiae	Babeliae	Babeliales	uncultured	Unclassified	-	0.0104134	0.00751371
	Bacteria	Proteobacteria	Gammaproteobacteria	Gammaproteobacteria_Incertae_Sedis	uncultured	Acidibacter	-	0.0312402	0.00375686
	Percentage of relative abundance						-	6.00854	6.52942
	Kingdom	Phylum	Class	Order	Family	Genus	Continuous	Stable	First-Flush
	Shared only by Stable IWS supply
	Bacteria	Myxococcota	Polyangia	mle1-27	mle1-27	mle1-27	-	0.0208268	-
	Bacteria	Cyanobacteria	Vampirivibrionia	Caenarcaniphilales	Caenarcaniphilales	Caenarcaniphilales	-	0.0416536	-
	Bacteria	Patescibacteria	ABY1	Candidatus_Magasanikbacteria	Candidatus_Magasanikbacteria	Candidatus_Magasanikbacteria	-	0.0208268	-
	Bacteria	Proteobacteria	Gammaproteobacteria	Acidiferrobacterales	Acidiferrobacteraceae	Sulfurifustis	-	0.0833073	-
	Bacteria	Proteobacteria	Alphaproteobacteria	Elsterales	uncultured	Unclassified	-	0.0624805	-
	Bacteria	Proteobacteria	Alphaproteobacteria	Rhodospirillales	Rhodospirillaceae	Unclassified	-	0.0208268	-
	Bacteria	Proteobacteria	Gammaproteobacteria	Methylococcales	Methylomonadaceae	Crenothrix	-	0.0624805	-
	Bacteria	Proteobacteria	Gammaproteobacteria	Burkholderiales	Chitinibacteraceae	Chitinibacter	-	0.0104134	-
	Bacteria	Proteobacteria	Gammaproteobacteria	Burkholderiales	T34	T34	-	0.0416536	-
	Bacteria	Proteobacteria	Gammaproteobacteria	Burkholderiales	Gallionellaceae	Gallionella	-	0.0208268	-
	Bacteria	Firmicutes	Bacilli	Lactobacillales	Streptococcaceae	Streptococcus	-	0.0208268	-
	Bacteria	Firmicutes	Bacilli	Staphylococcales	Staphylococcaceae	Staphylococcus	-	0.0312402	-
	Percentage of relative abundance						-	0.437363	-
	Kingdom	Phylum	Class	Order	Family	Genus	Continuous	Stable	First-Flush
	Shared continuous and first flush
	Bacteria	Proteobacteria	Gammaproteobacteria	Alteromonadales	Alteromonadaceae	Rheinheimera	2.53623	-	11.9393
	Bacteria	Proteobacteria	Alphaproteobacteria	Rhizobiales	Xanthobacteraceae	Bradyrhizobium	0.0374813	-	0.0751371
	Bacteria	Proteobacteria	Alphaproteobacteria	Caulobacterales	Caulobacteraceae	Caulobacter	0.0124938	-	0.0939214
	Bacteria	Proteobacteria	Gammaproteobacteria	Burkholderiales	Comamonadaceae	Aquabacterium	0.0249875	-	0.052596
	Bacteria	Proteobacteria	Gammaproteobacteria	Burkholderiales	Rhodocyclaceae	Zoogloea	0.0124938	-	0.00751371
	Bacteria	Firmicutes	Clostridia	Clostridiales	Clostridiaceae	Clostridium_sensu_stricto_12	0.049975	-	0.108949
	Percentage of relative abundance						2.67366	-	12.2774
	Kingdom	Phylum	Class	Order	Family	Genus	Continuous	Stable	First-Flush
	Shared only by first flush
	Bacteria	Proteobacteria	Alphaproteobacteria	Rhizobiales	Beijerinckiaceae	Bosea	-	-	1.31866
	Bacteria	Bdellovibrionota	Oligoflexia	Oligoflexales	Oligoflexales	Oligoflexus	-	-	0.612368
	Bacteria	Proteobacteria	Gammaproteobacteria	Burkholderiales	Burkholderiaceae	Limnobacter	-	-	0.477121
	Bacteria	Proteobacteria	Gammaproteobacteria	Cellvibrionales	Cellvibrionaceae	Cellvibrio	-	-	0.240439
	Bacteria	Proteobacteria	Gammaproteobacteria	Burkholderiales	Chromobacteriaceae	Vogesella	-	-	0.214141
	Bacteria	Proteobacteria	Gammaproteobacteria	Methylococcales	Methylomonadaceae	Methylomicrobium	-	-	0.195357
	Bacteria	Myxococcota	Myxococcia	Myxococcales	Anaeromyxobacteraceae	Anaeromyxobacter	-	-	0.165302
	Bacteria	Proteobacteria	Alphaproteobacteria	Dongiales	Dongiaceae	Dongia	-	-	0.165302
	Bacteria	Proteobacteria	Gammaproteobacteria	Steroidobacterales	Steroidobacteraceae	Steroidobacter	-	-	0.165302
	Bacteria	Nitrospirota	Nitrospiria	Nitrospirales	Nitrospiraceae	Nitrospira	-	-	0.142761
	Bacteria	Dependentiae	Babeliae	Babeliales	uncultured	Unclassified	-	-	0.123976
	Bacteria	Desulfobacterota	Syntrophobacteria	Syntrophobacterales	Syntrophobacteraceae	Syntrophobacter	-	-	0.116463
	Bacteria	Proteobacteria	Gammaproteobacteria	Burkholderiales	Nitrosomonadaceae	MND1	-	-	0.112706
	Bacteria	Bdellovibrionota	Bdellovibrionia	Bacteriovoracales	Bacteriovoracaceae	Peredibacter	-	-	0.105192
	Bacteria	Bacteroidota	Bacteroidia	Chitinophagales	Chitinophagaceae	Sediminibacterium	-	-	0.0901646
	Bacteria	Bacteroidota	Bacteroidia	Cytophagales	Microscillaceae	OLB12	-	-	0.0864077
	Bacteria	Proteobacteria	Gammaproteobacteria	Burkholderiales	Comamonadaceae	Ramlibacter	-	-	0.0864077
	Bacteria	Myxococcota	Polyangia	Nannocystales	Nannocystaceae	Nannocystis	-	-	0.0826508
	Bacteria	Proteobacteria	Gammaproteobacteria	Burkholderiales	Oxalobacteraceae	Massilia	-	-	0.078894
	Bacteria	Proteobacteria	Alphaproteobacteria	Rhizobiales	Rhizobiaceae	Allorhizobium--Rhizobium	-	-	0.0751371
	Bacteria	Myxococcota	Polyangia	Polyangiales	Polyangiaceae	Polyangium	-	-	0.0713803
	Bacteria	Myxococcota	Polyangia	Polyangiales	Sandaracinaceae	Unclassified	-	-	0.0713803
	Bacteria	Bacteroidota	Bacteroidia	Cytophagales	Microscillaceae	Ohtaekwangia	-	-	0.0676234
	Bacteria	Myxococcota	Polyangia	Polyangiales	uncultured	Unclassified	-	-	0.0638666
	Bacteria	Proteobacteria	Alphaproteobacteria	Caedibacterales	Caedibacteraceae	Caedibacter	-	-	0.0601097
	Bacteria	Bacteroidota	Bacteroidia	Bacteroidales	Bacteroidetes_vadinHA17	Bacteroidetes_vadinHA17	-	-	0.052596
	Bacteria	Bacteroidota	Bacteroidia	Chitinophagales	Chitinophagaceae	Dinghuibacter	-	-	0.052596
	Bacteria	Proteobacteria	Alphaproteobacteria	Sphingomonadales	Sphingomonadaceae	Unclassified	-	-	0.052596
	Bacteria	Proteobacteria	Gammaproteobacteria	Burkholderiales	Nitrosomonadaceae	Unclassified	-	-	0.052596
	Bacteria	Proteobacteria	Gammaproteobacteria	Burkholderiales	Oxalobacteraceae	Aquaspirillum	-	-	0.052596
	Bacteria	Proteobacteria	Gammaproteobacteria	Burkholderiales	Chromobacteriaceae	Paludibacterium	-	-	0.0488391
	Bacteria	Acidobacteriota	Blastocatellia	Blastocatellales	Blastocatellaceae	Unclassified	-	-	0.0488391
	Bacteria	Proteobacteria	Alphaproteobacteria	Sphingomonadales	Sphingomonadaceae	Sphingopyxis	-	-	0.0450823
	Bacteria	Bacteroidota	Bacteroidia	Cytophagales	Microscillaceae	Unclassified	-	-	0.0413254
	Bacteria	Bacteroidota	Bacteroidia	Sphingobacteriales	uncultured	Unclassified	-	-	0.0413254
	Bacteria	Proteobacteria	Gammaproteobacteria	Oceanospirillales	Alcanivoracaceae	Ketobacter	-	-	0.0413254
	Bacteria	Myxococcota	Myxococcia	Myxococcales	Myxococcaceae	Unclassified	-	-	0.0375686
	Bacteria	Proteobacteria	Alphaproteobacteria	Rhodobacterales	Rhodobacteraceae	Gemmobacter	-	-	0.0375686
	Bacteria	Myxococcota	Polyangia	Polyangiales	Polyangiaceae	Sorangium	-	-	0.0338117
	Bacteria	Proteobacteria	Gammaproteobacteria	Burkholderiales	Rhodocyclaceae	Thauera	-	-	0.0338117
	Bacteria	Proteobacteria	Gammaproteobacteria	Pseudomonadales	Moraxellaceae	Permianibacter	-	-	0.0338117
	Bacteria	Proteobacteria	Gammaproteobacteria	Steroidobacterales	Steroidobacteraceae	Unclassified	-	-	0.0338117
	Bacteria	Verrucomicrobiota	Verrucomicrobiae	Chthoniobacterales	Chthoniobacteraceae	Candidatus_Udaeobacter	-	-	0.0338117
	Bacteria	Actinobacteriota	Actinobacteria	Corynebacteriales	Dietziaceae	Dietzia	-	-	0.0300549
	Bacteria	Proteobacteria	Alphaproteobacteria	Sphingomonadales	Sphingomonadaceae	Unclassified	-	-	0.0300549
	Bacteria	Proteobacteria	Alphaproteobacteria	Sphingomonadales	Sphingomonadaceae	Sphingobium	-	-	0.0300549
	Bacteria	Proteobacteria	Gammaproteobacteria	Diplorickettsiales	Diplorickettsiaceae	Aquicella	-	-	0.0300549
	Bacteria	Proteobacteria	Gammaproteobacteria	Pseudomonadales	Moraxellaceae	Cavicella	-	-	0.0300549
	Bacteria	Acidobacteriota	Holophagae	Holophagales	Holophagaceae	Holophaga	-	-	0.026298
	Bacteria	Acidobacteriota	Holophagae	Holophagales	Holophagaceae	Geothrix	-	-	0.026298
	Bacteria	Desulfobacterota	Desulfuromonadia	Geobacterales	Geobacteraceae	Trichlorobacter	-	-	0.026298
	Bacteria	Myxococcota	Polyangia	Polyangiales	Polyangiaceae	Unclassified	-	-	0.026298
	Bacteria	Proteobacteria	Gammaproteobacteria	Burkholderiales	Comamonadaceae	Curvibacter	-	-	0.026298
	Bacteria	Proteobacteria	Gammaproteobacteria	uncultured	uncultured	Unclassified	-	-	0.026298
	Bacteria	Verrucomicrobiota	Verrucomicrobiae	Pedosphaerales	Pedosphaeraceae	Unclassified	-	-	0.026298
	Bacteria	Proteobacteria	Gammaproteobacteria	uncultured	uncultured	Unclassified	-	-	0.0225411
	Bacteria	Acidobacteriota	Acidobacteriae	Bryobacterales	Bryobacteraceae	Bryobacter	-	-	0.0225411
	Bacteria	Myxococcota	Myxococcia	Myxococcales	Myxococcaceae	KD3-10	-	-	0.0225411
	Bacteria	Proteobacteria	Alphaproteobacteria	Acetobacterales	Acetobacteraceae	Roseomonas	-	-	0.0225411
	Bacteria	Proteobacteria	Alphaproteobacteria	Reyranellales	Reyranellaceae	Reyranella	-	-	0.0225411
	Bacteria	Proteobacteria	Gammaproteobacteria	Burkholderiales	Comamonadaceae	Variovorax	-	-	0.0225411
	Bacteria	Proteobacteria	Gammaproteobacteria	Burkholderiales	Oxalobacteraceae	Herbaspirillum	-	-	0.0225411
	Bacteria	Proteobacteria	Gammaproteobacteria	Burkholderiales	uncultured	Unclassified	-	-	0.0225411
	Bacteria	uncultured	uncultured	uncultured	uncultured	Unclassified	-	-	0.0225411
	Bacteria	Bacteroidota	Bacteroidia	Chitinophagales	Saprospiraceae	Unclassified	-	-	0.0187843
	Bacteria	Proteobacteria	Alphaproteobacteria	Azospirillales	Azospirillaceae	Niveispirillum	-	-	0.0187843
	Bacteria	Acidobacteriota	Blastocatellia	Pyrinomonadales	Pyrinomonadaceae	RB41	-	-	0.0187843
	Bacteria	Bacteroidota	Bacteroidia	Sphingobacteriales	Sphingobacteriaceae	Arcticibacter	-	-	0.0187843
	Bacteria	Desulfobacterota	Desulfobulbia	Desulfobulbales	Desulfobulbaceae	Desulfobulbus	-	-	0.0187843
	Bacteria	Proteobacteria	Alphaproteobacteria	Caulobacterales	Caulobacteraceae	Phenylobacterium	-	-	0.0187843
	Bacteria	Proteobacteria	Alphaproteobacteria	Rhizobiales	Rhizobiaceae	Candidatus_Liberibacter	-	-	0.0187843
	Bacteria	Proteobacteria	Gammaproteobacteria	Burkholderiales	Comamonadaceae	Roseateles	-	-	0.0187843
	Bacteria	Proteobacteria	Gammaproteobacteria	Burkholderiales	Rhodocyclaceae	Sulfuritalea	-	-	0.0187843
	Bacteria	Proteobacteria	Gammaproteobacteria	Cellvibrionales	Spongiibacteraceae	BD1-7_clade	-	-	0.0187843
	Bacteria	Proteobacteria	Gammaproteobacteria	Methylococcales	Methylomonadaceae	pLW-20	-	-	0.0187843
	Bacteria	Bdellovibrionota	Bdellovibrionia	Bacteriovoracales	Bacteriovoracaceae	Unclassified	-	-	0.0150274
	Bacteria	Bdellovibrionota	Bdellovibrionia	Bdellovibrionales	Bdellovibrionaceae	Bdellovibrio	-	-	0.0150274
	Bacteria	Chloroflexi	Anaerolineae	Anaerolineales	Anaerolineaceae	Anaerolinea	-	-	0.0150274
	Bacteria	Firmicutes	Bacilli	Paenibacillales	Paenibacillaceae	Ammoniphilus	-	-	0.0150274
	Bacteria	Proteobacteria	Alphaproteobacteria	Caulobacterales	Caulobacteraceae	Brevundimonas	-	-	0.0150274
	Bacteria	Proteobacteria	Gammaproteobacteria	Burkholderiales	Chitinimonadaceae	Chitinivorax	-	-	0.0150274
	Bacteria	Proteobacteria	Gammaproteobacteria	Burkholderiales	uncultured	Unclassified	-	-	0.0150274
	Bacteria	Proteobacteria	Gammaproteobacteria	Legionellales	Legionellaceae	Unclassified	-	-	0.0150274
	Bacteria	Proteobacteria	Gammaproteobacteria	Pseudomonadales	Moraxellaceae	Unclassified	-	-	0.0150274
	Bacteria	Bacteroidota	Bacteroidia	Chitinophagales	Chitinophagaceae	Flavisolibacter	-	-	0.0112706
	Bacteria	Chloroflexi	Anaerolineae	Anaerolineales	Anaerolineaceae	Unclassified	-	-	0.0112706
	Bacteria	Desulfobacterota	Desulfovibrionia	Desulfovibrionales	Desulfomicrobiaceae	Desulfomicrobium	-	-	0.0112706
	Bacteria	Desulfobacterota	Desulfuromonadia	Geobacterales	Geobacteraceae	Geobacter	-	-	0.0112706
	Bacteria	Firmicutes	Clostridia	Clostridiales	Clostridiaceae	Clostridium_sensu_stricto_11	-	-	0.0112706
	Bacteria	Planctomycetota	Phycisphaerae	Phycisphaerales	Phycisphaeraceae	SM1A02	-	-	0.0112706
	Bacteria	Proteobacteria	Gammaproteobacteria	Burkholderiales	Comamonadaceae	Mitsuaria	-	-	0.0112706
	Bacteria	Proteobacteria	Gammaproteobacteria	Burkholderiales	Nitrosomonadaceae	Ellin6067	-	-	0.0112706
	Bacteria	Proteobacteria	Gammaproteobacteria	Burkholderiales	Rhodocyclaceae	Azoarcus	-	-	0.0112706
	Bacteria	Proteobacteria	Gammaproteobacteria	Burkholderiales	Sutterellaceae	Unclassified	-	-	0.0112706
	Bacteria	Proteobacteria	Gammaproteobacteria	Cellvibrionales	Porticoccaceae	C1-B045	-	-	0.0112706
	Bacteria	Spirochaetota	Spirochaetia	Spirochaetales	Spirochaetaceae	Unclassified	-	-	0.0112706
	Bacteria	Verrucomicrobiota	Verrucomicrobiae	Chthoniobacterales	Xiphinematobacteraceae	Candidatus_Xiphinematobacter	-	-	0.0112706
	Bacteria	Actinobacteriota	Actinobacteria	Streptomycetales	Streptomycetaceae	Streptomyces	-	-	0.00751371
	Bacteria	Bacteroidota	Bacteroidia	Bacteroidales	Paludibacteraceae	Paludibacterium	-	-	0.00751371
	Bacteria	Bacteroidota	Bacteroidia	Chitinophagales	Chitinophagaceae	Lacibacter	-	-	0.00751371
	Bacteria	Bacteroidota	Bacteroidia	Chitinophagales	Chitinophagaceae	Puia	-	-	0.00751371
	Bacteria	Bacteroidota	Bacteroidia	Cytophagales	Amoebophilaceae	Unclassified	-	-	0.00751371
	Bacteria	Bacteroidota	Bacteroidia	Cytophagales	Microscillaceae	Chryseolinea	-	-	0.00751371
	Bacteria	Firmicutes	Bacilli	Brevibacillales	Brevibacillaceae	Brevibacillus	-	-	0.00751371
	Bacteria	Myxococcota	Myxococcia	Myxococcales	Myxococcaceae	Melittangium	-	-	0.00751371
	Bacteria	Myxococcota	Polyangia	Polyangiales	Phaselicystidaceae	Phaselicystis	-	-	0.00751371
	Bacteria	Patescibacteria	Gracilibacteria	Gracilibacteria	Gracilibacteria	Gracilibacteria	-	-	0.00751371
	Bacteria	Planctomycetota	Planctomycetes	Gemmatales	Gemmataceae	Gemmata	-	-	0.00751371
	Bacteria	Planctomycetota	Planctomycetes	Pirellulales	Pirellulaceae	Pirellula	-	-	0.00751371
	Bacteria	Proteobacteria	Alphaproteobacteria	Rickettsiales	Anaplasmataceae	Neorickettsia	-	-	0.00751371
	Bacteria	Proteobacteria	Alphaproteobacteria	Sphingomonadales	Sphingomonadaceae	Ellin6055	-	-	0.00751371
	Bacteria	Proteobacteria	Gammaproteobacteria	Burkholderiales	Rhodocyclaceae	C39	-	-	0.00751371
	Bacteria	Proteobacteria	Gammaproteobacteria	Pseudomonadales	Moraxellaceae	Perlucidibaca	-	-	0.00751371
	Bacteria	Acidobacteriota	Vicinamibacteria	Vicinamibacterales	Vicinamibacteraceae	Unclassified	-	-	0.00375686
	Bacteria	Actinobacteriota	Actinobacteria	Micrococcales	Bogoriellaceae	Georgenia	-	-	0.00375686
	Bacteria	Bacteroidota	Bacteroidia	Bacteroidales	Prolixibacteraceae	Unclassified	-	-	0.00375686
	Bacteria	Bacteroidota	Bacteroidia	Chitinophagales	Chitinophagaceae	Niastella	-	-	0.00375686
	Bacteria	Bacteroidota	Bacteroidia	Chitinophagales	Chitinophagaceae	Aurantisolimonas	-	-	0.00375686
	Bacteria	Bacteroidota	Bacteroidia	Flavobacteriales	Crocinitomicaceae	Fluviicola	-	-	0.00375686
	Bacteria	Bacteroidota	Bacteroidia	Flavobacteriales	Flavobacteriaceae	Flavobacterium	-	-	0.00375686
	Bacteria	Fibrobacterota	Fibrobacteria	Fibrobacterales	Fibrobacteraceae	Unclassified	-	-	0.00375686
	Bacteria	Gemmatimonadota	Gemmatimonadetes	Gemmatimonadales	Gemmatimonadaceae	Unclassified	-	-	0.00375686
	Bacteria	Planctomycetota	Planctomycetes	Isosphaerales	Isosphaeraceae	Tundrisphaera	-	-	0.00375686
	Bacteria	Planctomycetota	Planctomycetes	Planctomycetales	uncultured	Unclassified	-	-	0.00375686
	Bacteria	Proteobacteria	Alphaproteobacteria	Caulobacterales	Hyphomonadaceae	Hirschia	-	-	0.00375686
	Bacteria	Proteobacteria	Gammaproteobacteria	Burkholderiales	Methylophilaceae	Methylophilus	-	-	0.00375686
	Bacteria	Proteobacteria	Gammaproteobacteria	Burkholderiales	Rhodocyclaceae	Unclassified	-	-	0.00375686
	Bacteria	Proteobacteria	Gammaproteobacteria	Xanthomonadales	Xanthomonadaceae	Stenotrophomonas	-	-	0.00375686
	Bacteria	Proteobacteria	Gammaproteobacteria	Xanthomonadales	Xanthomonadaceae	Pseudoxanthomonas	-	-	0.00375686
	Bacteria	Proteobacteria	Gammaproteobacteria	Xanthomonadales	Xanthomonadaceae	Lysobacter	-	-	0.00375686
	Bacteria	Spirochaetota	Leptospirae	Leptospirales	Leptospiraceae	Turneriella	-	-	0.00375686
	Bacteria	Verrucomicrobiota	Verrucomicrobiae	Opitutales	Opitutaceae	Lacunisphaera	-	-	0.00375686
	Bacteria	Verrucomicrobiota	Verrucomicrobiae	Pedosphaerales	Pedosphaeraceae	Pedosphaeraceae	-	-	0.00375686
	Percentage of relative abundance						-	-	6.984
