# Supplementary material for: Bacterial communities in a neotropical full-scale drinking water system including intermittent piped water supply, from sources to taps
Source: Royal Society of Chemistry journal article supplement (doi:10.1039/d3ew00224a), 2023-01-01
Supplement: d3ew00224a2.pdf [file d3ew00224a2.pdf]

## Supplemental Information

# Bacterial communities in a Neotropical full-scale drinking water system including intermittent piped water supply, from sources to taps

*Karina A. Chavarria,<sup>1,2</sup> Carlos I. Gonzalez<sup>3,4</sup>, Amador Goodridg<sup>3</sup>, Kristin Saltonstall<sup>2</sup>, Kara L. Nelson<sup>1\*</sup>*

<sup>1</sup> *Department of Civil and Environmental Engineering, University of California, Berkeley, California 94720-1710, United States*

<sup>2</sup> *Smithsonian Tropical Research Institute (STRI), Apartado 0843-0392 Balboa, Ancon, Panama*

<sup>3</sup> *Instituto de Investigaciones Científicas y Servicios de Alta Tecnología (INDICASAT-AIP), City of Knowledge, Panama*

<sup>4</sup> *Universidad Tecnológica de Panamá (UTP), Campus Victor Levy Sasso, Ancon, Panama City, Panama*

\* Corresponding Author: Kara L. Nelson  
*Department of Civil and Environmental Engineering, University of California, Berkeley, California 94720-1710, United States*  
karanelson@berkeley.edu

Supplemental Figure 1-8.  
Supplemental Tables 1 & 4.  
See Supplemental Tables 2 & 5 in excel document.

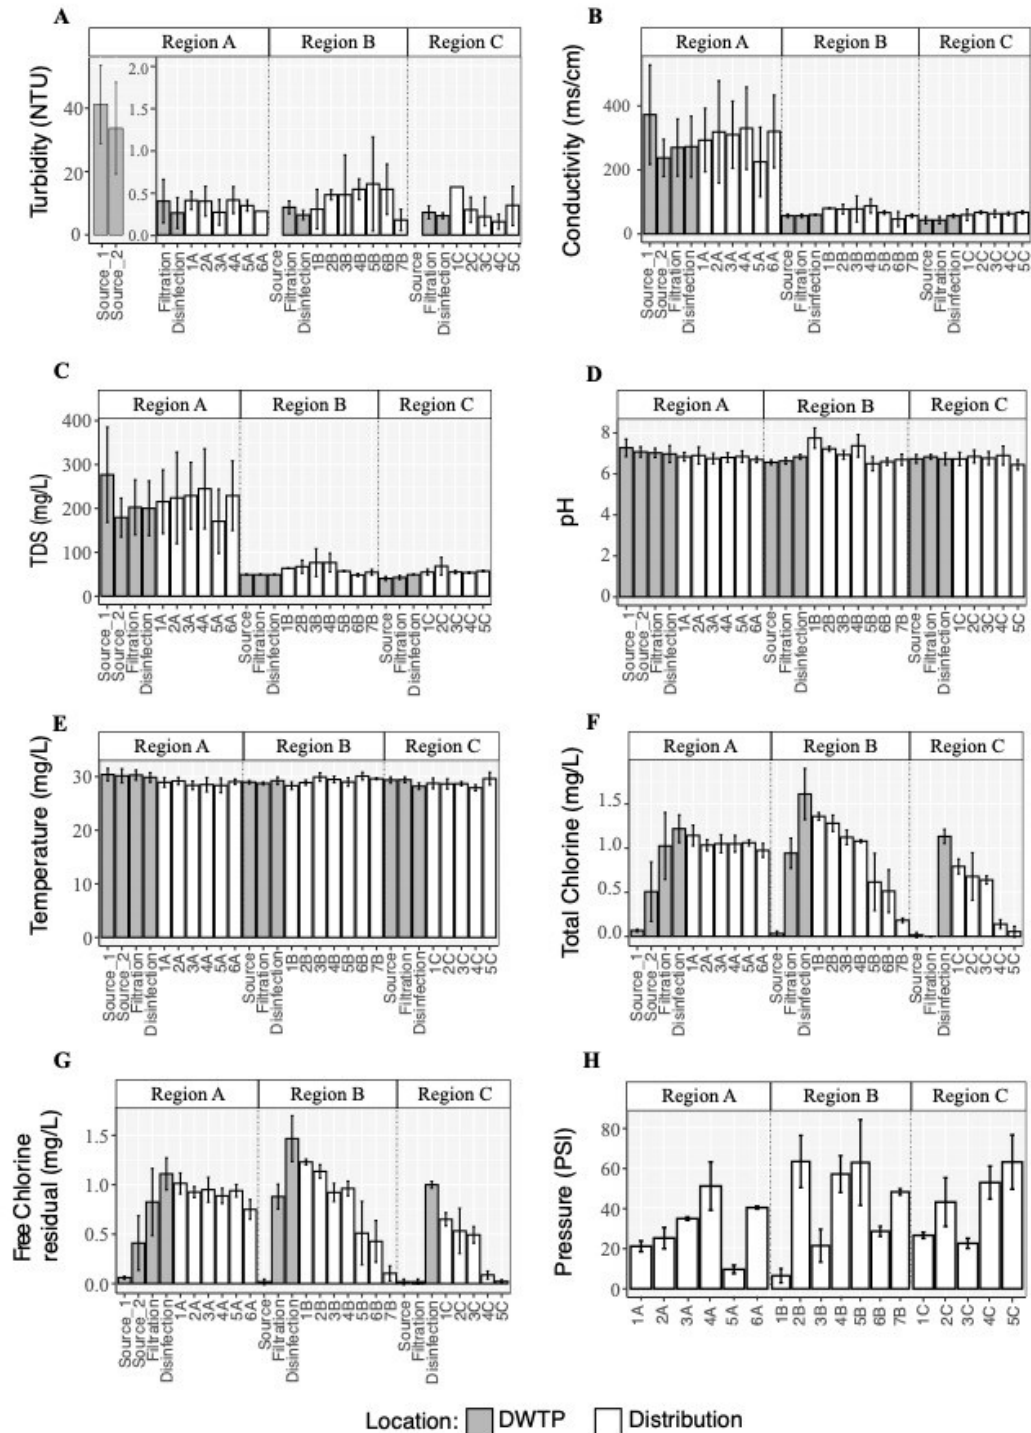

**Supplemental Figure 1.** Mean and standard deviation of water quality metrics measured in this study (on site). Each location was sampled three to four times. Measurements are divided in three regions that correspond to the three DWTPs that served Arraiján, Panama. Locations in the distribution system were labelled based on distance to the DWTP it is supplied from (i.e., the highest location number corresponds to the farthest location). Only Stable IWS samples were included for location 3B (IWS) in this part of the analysis. TDS = Total dissolved solids.

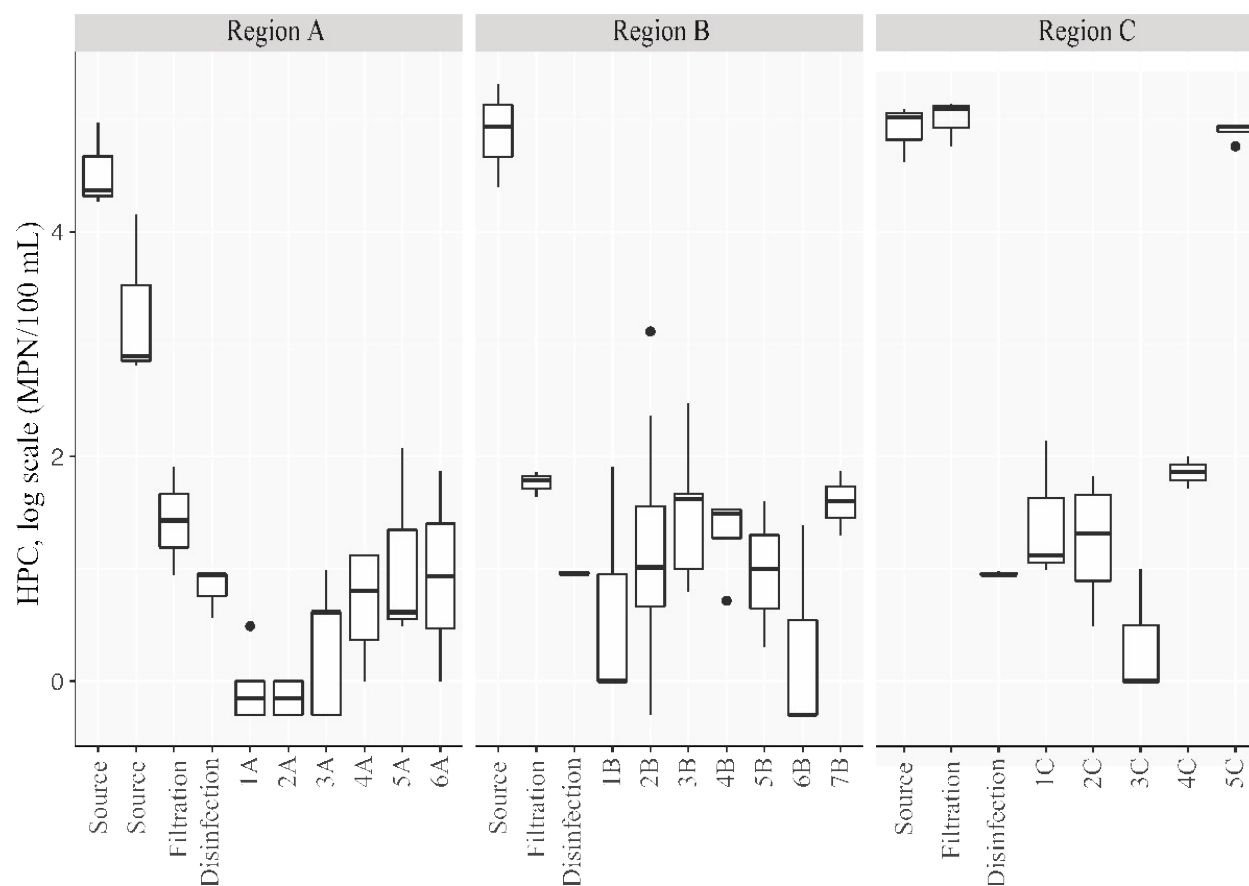

**Supplemental Figure 2.** Heterotrophic plate count (HPC) concentrations found across sample types and sampling locations. Measurements are divided in three regions that correspond to the three DWTPs that served Arraiján, Panama. Locations in the distribution system were labelled based on distance to the DWTP it is supplied from (i.e., the highest location number corresponds to the farthest location). Only Stable IWS samples were included for location 3B (IWS) in this part of the analysis. MPN = Most probable number.

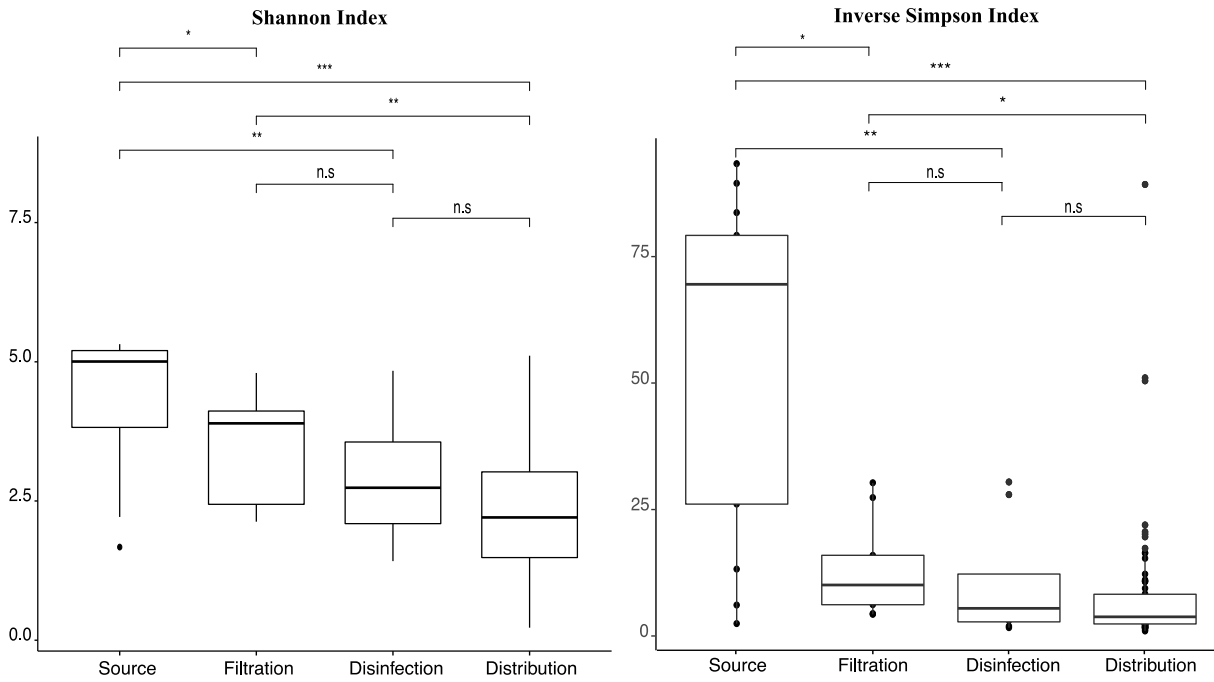

**Supplemental Figure 3.** Alpha diversity metrics (Shannon and Inverse Simpson Indices) for the different sample types in this study. Asterix represent statistical significance (Kruskal-Wallis tests with bonferroni corrections) \* = ( $p < 0.05$ ), \*\* = ( $p < 0.01$ ), \*\*\* = ( $p < 0.001$ ).

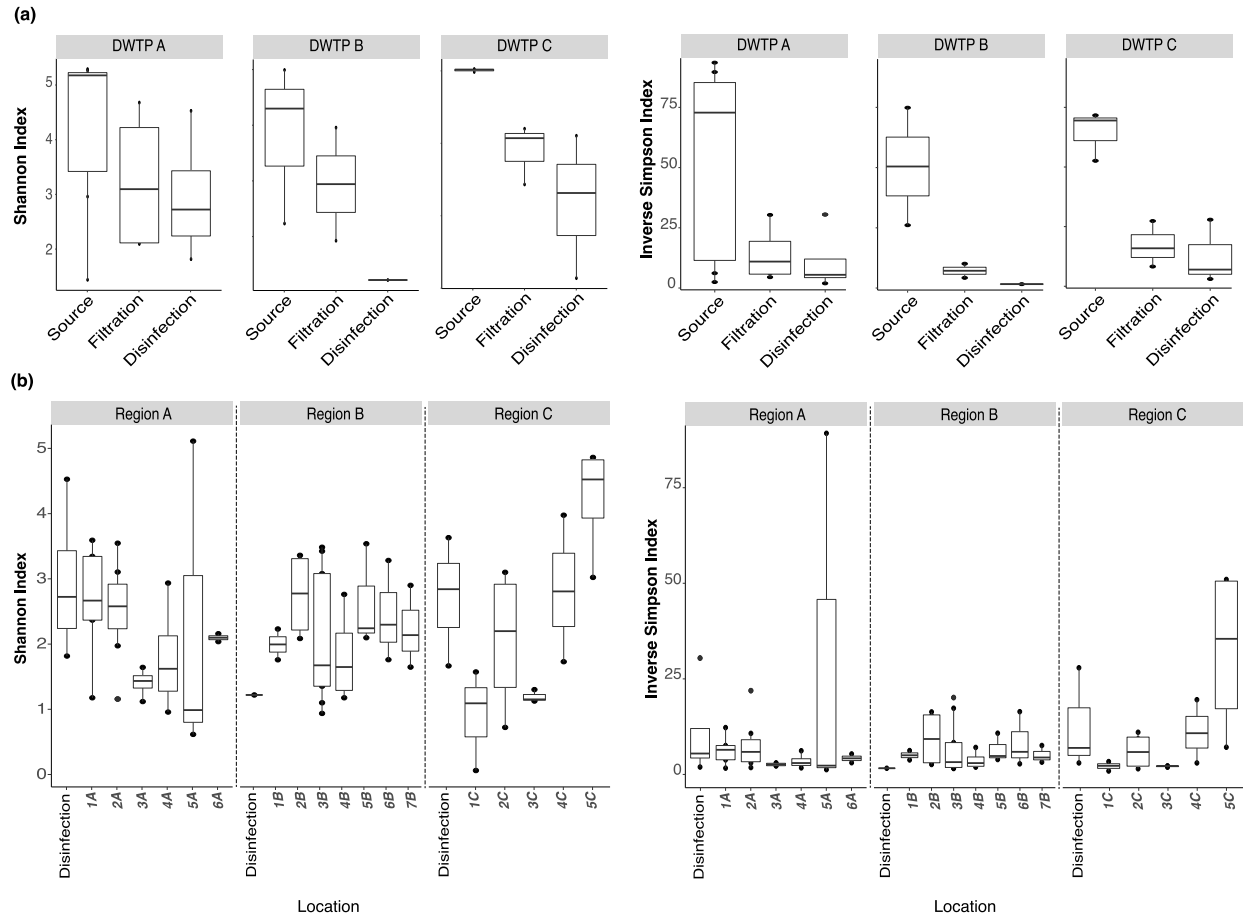

**Supplemental Figure 4.** Alpha diversity (Shannon and Inverse Simpson Indices) in the drinking water system of Arraijan, Panama by region and sampling location: (a) Shannon and Inverse Simpson diversity across treatment processes at each drinking water treatment plant; (b) Shannon and Inverse Simpson diversity across the various sampling locations in the distribution system.

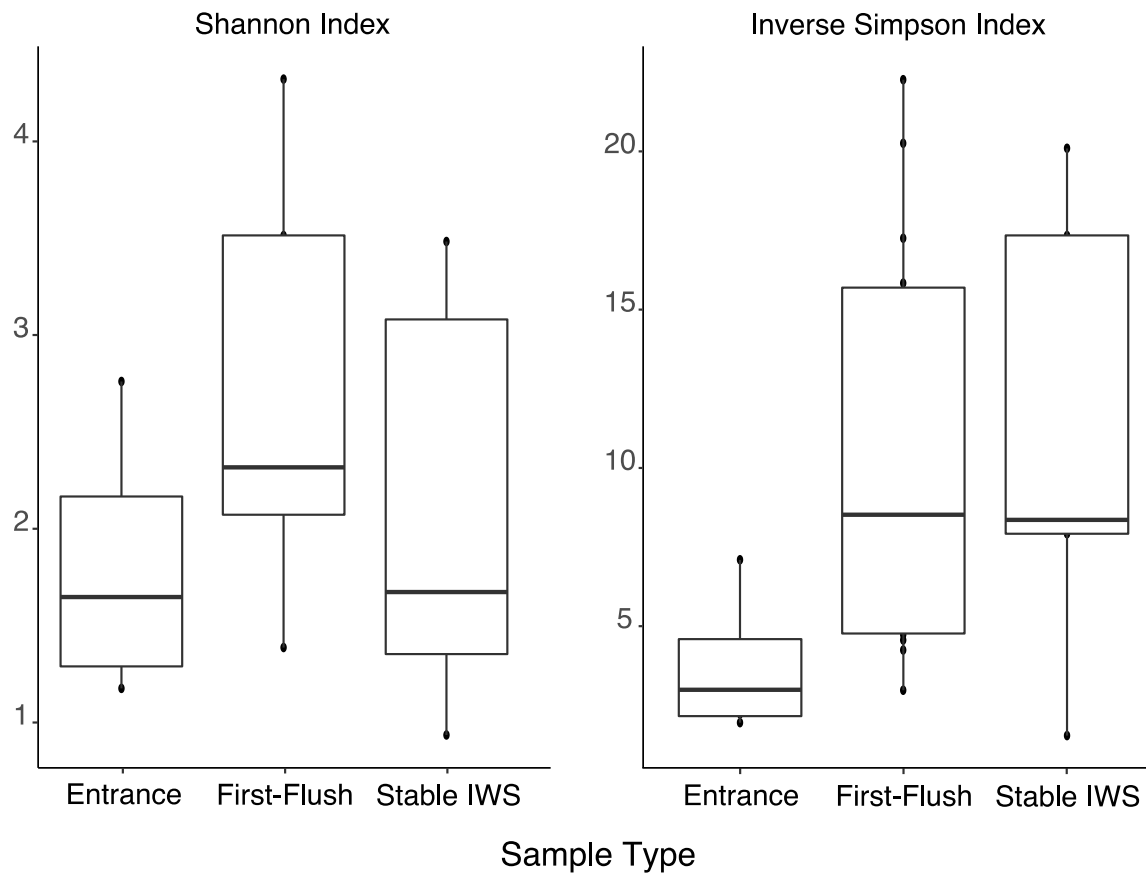

**Supplemental Figure 5.** Microbial community diversity in stable and intermittent water supply. Shannon and Inverse Simpson diversity indices for each sample type in the IWS zone.

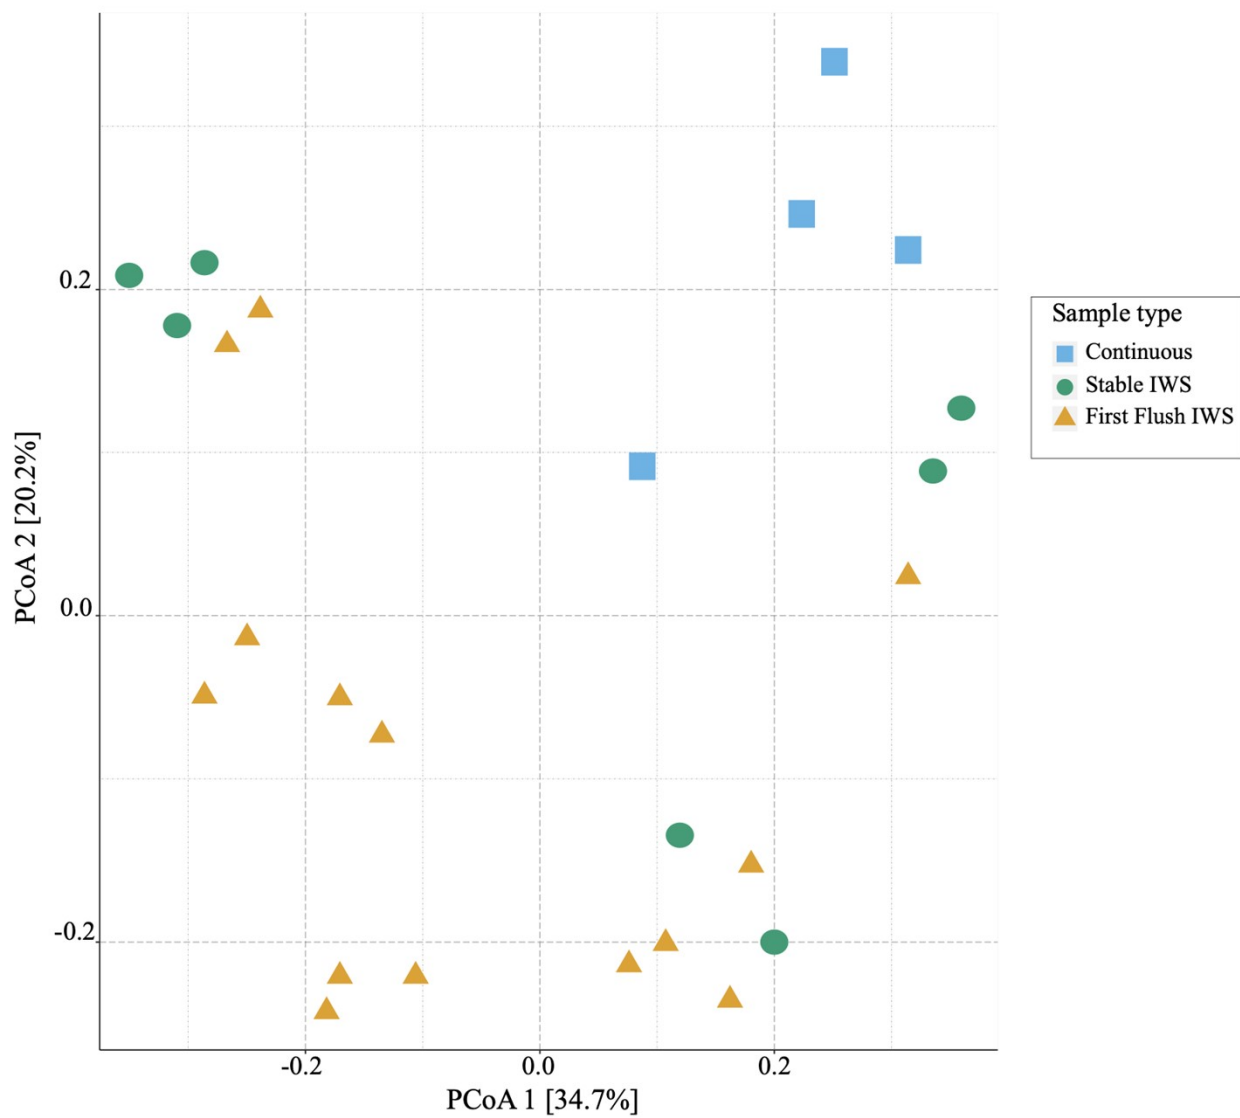

**Supplemental Figure 6.** Principal Coordinate Analysis (PCoA) using weighted UniFrac distance of all samples taken at the section of the drinking water distribution with IWS. Continuous samples are the samples taken at the entrance of the IWS neighbourhood.

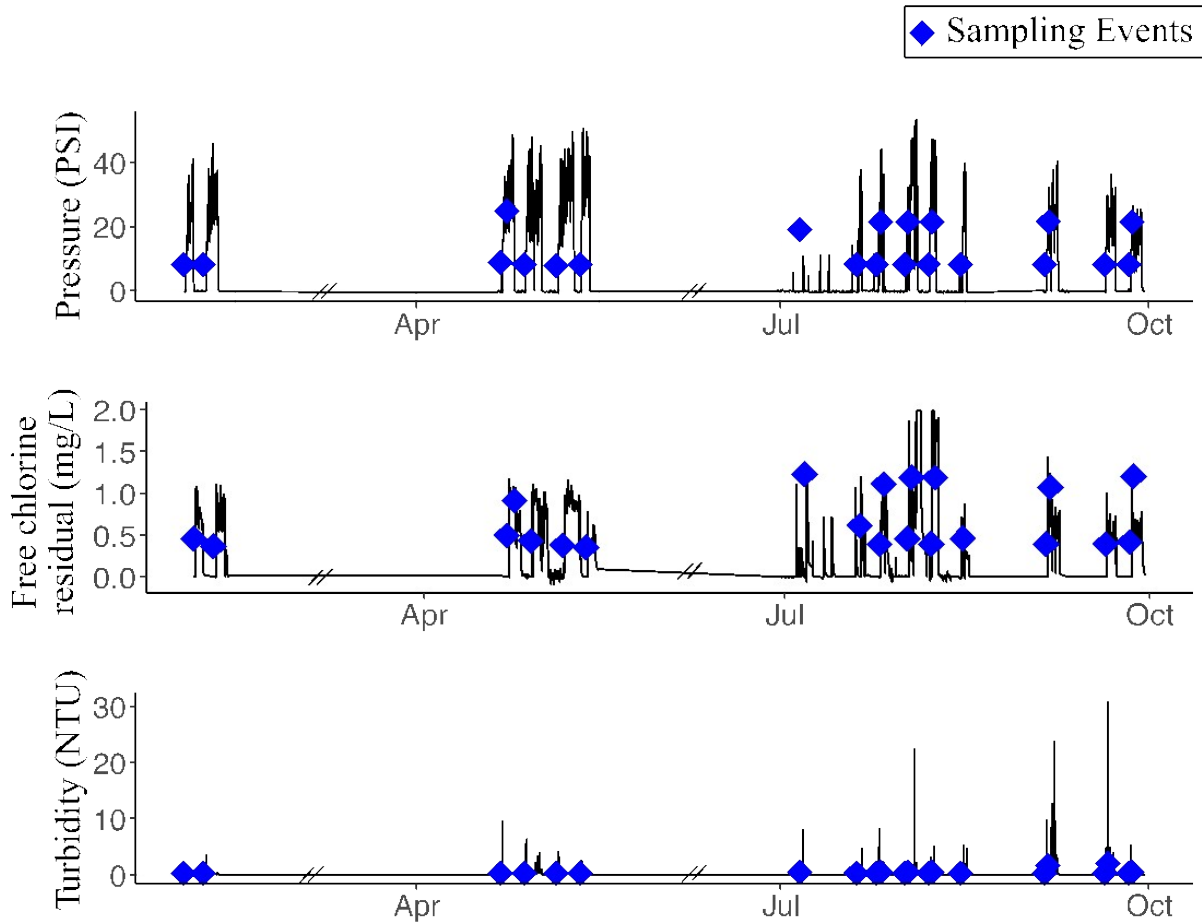

**Supplemental Figure 7.** Continuous monitoring data of water quality measurements during IWS for the duration of the study. Blue diamonds indicate grab samples collected for both water quality control and 16S rRNA gene sequencing. High turbidity at the beginning of supply while chlorine measurements are zero may be due to air that was trapped in the pipes being expelled through the sensor.



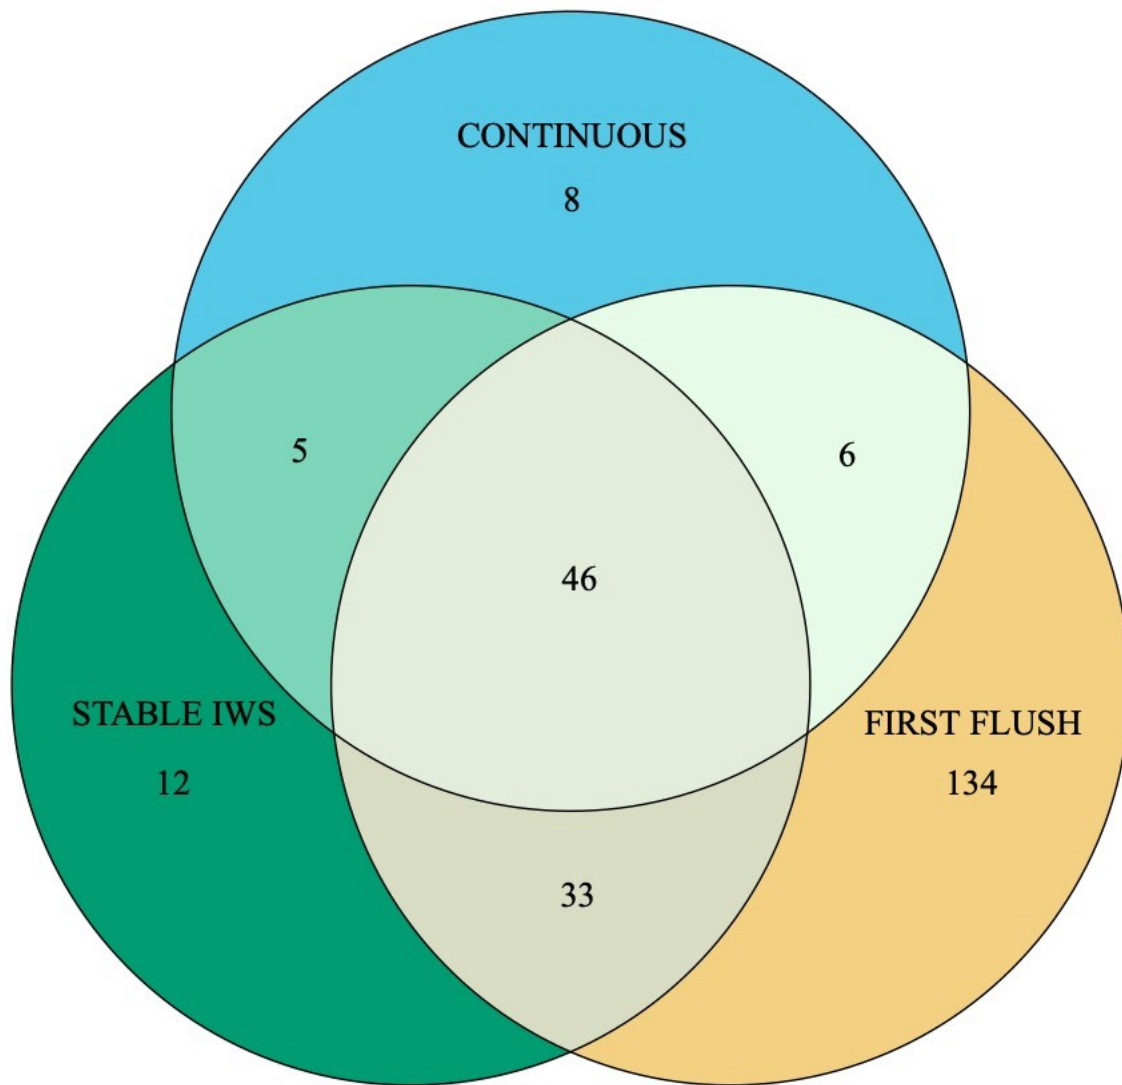

**Supplemental Figure 8. Venn Diagram of shared and unique number of ASVs between IWS sample types.**

**Supplemental Table 1.** General parameters for the three DWTPs in this study. ACP = Panama Canal Authority. IDAAN = Panama's Institute of National Aqueducts and Sewers. ACP and IDAAN are governmental agencies. Aguas Panama is a private entity that sells water to IDAAN for its distribution. Gatun lake is a large artificial lake (425 km<sup>2</sup>) that forms a major part of the Panama Canal. \* Drinking water conventional treatment included: 1) potassium aluminium sulfate, sodium silicofluoride and calcium hydroxide as coagulants and additives; 2) rapid sand filtration with gravel, sand and anthracite media; and 3) chlorination using chlorine gas.

|                                  | DWTP A                                    | DWTP B                      | DWTP C                      |
|----------------------------------|-------------------------------------------|-----------------------------|-----------------------------|
| <b>Year of construction</b>      | 1915                                      | 2002                        | 2014                        |
| <b>Regions served</b>            | Arraiján & La Chorrera                    | Arraiján                    | Panama City & Arraiján      |
| <b>Elevation (m)</b>             | 60                                        | 123                         | 122                         |
| <b>Administered by</b>           | ACP                                       | Aguas Panama                | IDAAN                       |
| <b>Population served</b>         | 199,777                                   | 278,157                     | 128,091                     |
| <b>Source water</b>              | Chagres River & Gatún Lake<br>(2 intakes) | Gatún Lake (1 intake)       | Gatún Lake (1 intake)       |
| <b>Capacity (MGDs)</b>           | 31.6                                      | 20.1                        | 13.4                        |
| <b>Treatment*</b>                | Conventional                              | Conventional                | Conventional                |
| <b>Filtration cleaning cycle</b> | 52-60 hours/turbidity check               | 52-60 hours/turbidity check | 60-72 hours/turbidity check |
| <b>Number of filter</b>          | 20                                        | 10                          | 11                          |

**Supplemental Table 3:** Monitoring data for IWS based on grab samples. Shown are mean and standard deviations. Letters indicate significant differences between sample types ( $p < 0.05$ ) based on Kruskal-Wallis and pairwise Wilcox (with Benjamini-Hochberg correction) tests.

| Sampling Location                        | Upstream Entrance | Downstream First Flush                  | Downstream Stable  |
|------------------------------------------|-------------------|-----------------------------------------|--------------------|
| Supply Type                              | Continuous        | IWS                                     | IWS                |
| Free Chlorine (mg/L)                     | $1.0 \pm 0.1^a$   | $0.3 \pm 0.1^b$                         | $0.9 \pm 0.1^a$    |
| Total Chlorine (mg/L)                    | $1.1 \pm 0.0^a$   | $0.5 \pm 0.1^b$                         | $1.1 \pm 0.1^a$    |
| Turbidity (NTU)                          | $0.5 \pm 0.1^a$   | $1.7 \pm 0.5^a$                         | $0.5 \pm 0.5^a$    |
| pH                                       | $7.4 \pm 0.5^a$   | $7.4 \pm 0.4^a$                         | $6.9 \pm 0.2^a$    |
| Temperature $^{\circ}\text{C}$           | $29.5 \pm 0.6^a$  | $31.1 \pm 1.4^b$                        | $29.9 \pm 0.8^a$   |
| Conductivity ( $\mu\text{S}/\text{cm}$ ) | $0.1 \pm 0.0^a$   | $0.08 \pm 0.03^b$                       | $0.1 \pm 0.0^b$    |
| TDS (mg/L)                               | $76.5 \pm 21.3^a$ | $69.3 \pm 21.1^b$                       | $76.5 \pm 31.7^a$  |
| Pressure (PSI)                           | $59.0 \pm 10.4^a$ | $7.5 \pm 2.5^b$                         | $21.5 \pm 8.2^c$   |
| HPC (MPN/100mL)                          | $22.0 \pm 14^a$   | $4.3 \times 10^4 \pm 2.8 \times 10^4^b$ | $70.0 \pm 109.0^c$ |

**Supplemental Table 4.** Mean relative abundance and standard deviation of phyla found in Arraiján's DWDS by sample type and region.

| <b>Region A</b>  |               |                   |                     |                     |
|------------------|---------------|-------------------|---------------------|---------------------|
| <b>Phylum</b>    | <b>Source</b> | <b>Filtration</b> | <b>Disinfection</b> | <b>Distribution</b> |
| Proteobacteria   | 55.9 ± 2.7    | 64.9 ± 4.4        | 63.9 ± 8.1          | 54.3 ± 6.0          |
| Actinobacteria   | 12.9 ± 0.7    | 8.1 ± 2.2         | 2.8 ± 0.3           | 1.4 ± 2.3           |
| Bacteroidetes    | 12.5 ± 0.8    | 1.5 ± 0.2         | 2.3 ± 0.3           | 1.3 ± 1.1           |
| Cyanobacteria    | 0.6 ± 0.1     | 3.9 ± 1.2         | 0.6 ± 0.2           | 38.3 ± 12.1         |
| Firmicutes       | 0.2 ± 0.1     | 9.7 ± 0.4         | 19.15 ± 0.7         | 2.2 ± 0.4           |
| Verrucomicrobia  | 3.6 ± 0.3     | 1.2 ± 0.1         | 2.1 ± 1.5           | 0.6 ± 0.4           |
| Planctomycetes   | 5.1 ± 0.4     | 5.8 ± 3.1         | 2.5 ± 1.3           | 0.1 ± 0.1           |
| Acidobacteria    | 2.3 ± 0.2     | 1.9 ± 0.7         | 3.0 ± 0.9           | 0.4 ± 0.2           |
| Chloroflexi      | 1.3 ± 0.1     | 1.6 ± 1.2         | 0.7 ± 0.2           | 0.1 ± 0.1           |
| Patescibacteria  | 0.2 ± 0.1     | 0.1 ± 0.0         | < 0.1               | 0.2 ± 0.1           |
| Myxococcota      | 0.3 ± 0.0     | 0.7 ± 0.4         | 1.6 ± 0.3           | 0.5 ± 0.3           |
| Nitrospira       | 1.2 ± 0.5     | -                 | 0.5 ± 0.5           | 0.1 ± 0.3           |
| SAR324_clade     | 1.2 ± 0.9     | -                 | -                   | < 0.1               |
| Gemmatimonadetes | 0.9 ± 0.2     | 0.1 ± 0.1         | 0.2 ± 0.0           | < 0.1               |
| Latescibacteria  | 0.6 ± 0.5     | 0.1 ± 0.0         | < 0.1               | < 0.1               |
| <b>Region B</b>  |               |                   |                     |                     |
| <b>Phylum</b>    | <b>Source</b> | <b>Filtration</b> | <b>Disinfection</b> | <b>Distribution</b> |
| Proteobacteria   | 29.4 ± 0.5    | 74.2 ± 3.9        | 88.3 ± 0.4          | 87.2 ± 6.6          |
| Actinobacteria   | 34.4 ± 1.4    | 6.1 ± 4.0         | -                   | 0.1 ± 0.2           |
| Bacteroidetes    | 12.5 ± 0.3    | 1.6 ± 0.4         | 8.0 ± 2.7           | 5.0 ± 4.7           |
| Cyanobacteria    | 4.5 ± 1.0     | 14.6 ± 4.0        | 1.8 ± 0.2           | 5.3 ± 1.8           |
| Firmicutes       | 0.1 ± 0.0     | 0.2 ± 0.0         | 0.1 ± 0.0           | 1.2 ± 0.8           |
| Verrucomicrobia  | 3.4 ± 0.1     | 1.3 ± 0.1         | -                   | 0.4 ± 0.3           |
| Planctomycetes   | 0.6 ± 0.1     | 1.0 ± 0.2         | 1.7 ± 0.3           | 0.4 ± 0.2           |
| Acidobacteria    | 0.6 ± 0.1     | 0.4 ± 0.1         | -                   | 0.1 ± 0.2           |
| Chloroflexi      | 12.1 ± 2.5    | 0.3 ± 0.1         | -                   | < 0.1               |
| Patescibacteria  | 0.3 ± 0.1     | 0.1 ± 0.0         | -                   | < 0.1               |
| Myxococcota      | 0.4 ± 0.0     | 0.1 ± 0.0         | 0.3 ± 0.0           | 0.2 ± 0.2           |
| Nitrospira       | < 0.1         | 0.1 ± 0.0         | -                   | < 0.1               |
| SAR324_clade     | 1.0 ± 0.1     | -                 | -                   | -                   |
| Gemmatimonadetes | 0.2 ± 0.1     | 0.1 ± 0.1         | -                   | < 0.1               |
| Latescibacteria  | 0.1 ± 0.1     | -                 | -                   | -                   |
| <b>Region C</b>  |               |                   |                     |                     |
| <b>Phylum</b>    | <b>Source</b> | <b>Filtration</b> | <b>Disinfection</b> | <b>Distribution</b> |
| Proteobacteria   | 39.6 ± 0.8    | 50.0 ± 1.7        | 72.7 ± 1.7          | 84.8 ± 7.6          |
| Actinobacteria   | 12.9 ± 0.6    | 6.5 ± 0.5         | 0.7 ± 0.1           | 0.5 ± 0.3           |
| Bacteroidetes    | 16.3 ± 0.4    | 30.3 ± 3.4        | 11.1 ± 2.5          | 4.3 ± 4.0           |
| Cyanobacteria    | 7.8 ± 1.4     | 2.0 ± 0.3         | 7.0 ± 1.0           | 1.6 ± 1.4           |
| Firmicutes       | 0.1 ± 0.1     | 0.1 ± 0.0         | 1.1 ± 0.1           | 0.3 ± 0.2           |
| Verrucomicrobia  | 6.4 ± 0.3     | 5.2 ± 0.6         | 1.0 ± 0.1           | 3.0 ± 0.7           |
| Planctomycetes   | 6.0 ± 0.5     | 1.5 ± 0.3         | 5.5 ± 0.5           | 1.6 ± 1.4           |
| Acidobacteria    | 1.5 ± 0.4     | 2.0 ± 0.4         | 0.1 ± 0.0           | 0.3 ± 0.2           |
| Chloroflexi      | 3.4 ± 0.7     | 0.5 ± 0.0         | 0.1 ± 0.0           | 0.1 ± 0.1           |
| Patescibacteria  | 0.4 ± 0.3     | 0.3 ± 0.2         | 0.4 ± 0.2           | 2.2 ± 0.2           |
| Myxococcota      | 0.6 ± 0.1     | 0.4 ± 0.4         | 0.4 ± 0.3           | 0.3 ± 0.3           |
| Nitrospira       | 0.4 ± 0.3     | < 0.1             | 0.1 ± 0.1           | 0.1 ± 0.1           |
| SAR324_clade     | 0.7 ± 0.1     | < 0.1             | -                   | 0.1 ± 0.1           |
| Gemmatimonadetes | 0.2 ± 0.2     | 0.1 ± 0.0         | -                   | 0.1 ± 0.3           |
| Latescibacteria  | 0.1 ± 0.0     | -                 | -                   | < 0.1               |
